# Supplementary material for: Spatial effects of environmental pollution on healthcare services: Evidence from China
Source: Preprints.org preprint supplement (doi:10.20944/preprints202101.0246.v1), 2021-01-13
Supplement: Supplementary file 1 [file supplementary]

## Sheet: Sheet1
		ID	time	OV	IV	GE	ED	SD	HWD	PM2.5	TP	POP	0-14	65	GDP	HD
北京	beijing	1	2017	12.6397	0.184596	0.0103927	74.8205	0.353913	0.999	48.9131	17801000	0.865	0.109095	0.124993	128994	0.476097
天津	tianjing	2	2017	9.4694	0.123728	0.0205901	71.0518	1.16998	0.944	68.5024	12778000	0.8293	0.112928	0.11285	118944	0.288503
河北	hebei	3	2017	6.95809	0.189286	0.0396563	40.8603	5.27027	0.998	51.4288	62086000	0.5501	0.179622	0.117998	45387	0.0998764
山西	shanxi	4	2017	4.41899	0.1491	0.0500131	44.2085	11.1823	0.949	41.6244	30550000	0.5734	0.156039	0.0898854	42060	0.149225
内蒙古	neimenggu	5	2017	4.98825	0.174397	0.0761667	50.0029	13.4074	0.994	27.0893	20849000	0.6202	0.13545	0.108398	63764	0.181266
辽宁	liaoning	6	2017	5.56034	0.20437	0.0431566	66.16	7.63602	0.991	36.8318	35969000	0.6749	0.101476	0.14076	53527	0.173394
吉林	jilin	7	2017	4.81627	0.170933	0.0275241	54.167	2.29352	0.718	34.8416	22424000	0.5665	0.12442	0.121968	54838	0.148197
黑龙江	heilongjiang	8	2017	3.77588	0.193498	0.0353749	44.1973	2.26233	0.827	28.1128	31251000	0.594	0.0994528	0.121372	41916	0.133807
上海	shanghai	9	2017	13.4167	0.197317	0.0130838	106.906	0.822153	1	58.142	19826000	0.877	0.0994653	0.142591	126634	0.340297
江苏	jiangsu	10	2017	8.8351	0.214523	0.0258502	87.0191	1.81573	1	63.5657	66100000	0.6876	0.134478	0.139334	107150	0.172867
浙江	zhejiang	11	2017	12.7756	0.203831	0.0166599	97.4674	0.963004	1	36.2658	46573000	0.68	0.121723	0.124793	92057	0.155763
安徽	anhui	12	2017	5.42026	0.192826	0.0194781	45.2666	2.32336	0.999	59.6254	51658000	0.5349	0.191006	0.129951	43401	0.095217
福建	fujian	13	2017	7.01406	0.171038	0.018041	73.9515	1.69517	0.994	22.8968	32221000	0.648	0.184848	0.0952484	82677	0.150759
江西	jiangxi	14	2017	5.65993	0.216912	0.0222834	49.6193	3.23376	0.976	40.0531	38163000	0.546	0.216047	0.0975552	43424	0.0843301
山东	shandong	15	2017	7.80587	0.221243	0.0296635	60.5905	2.89993	1	62.8149	82502000	0.6058	0.17682	0.129354	72807	0.132627
河南	henan	16	2017	7.40459	0.22091	0.0148421	51.7824	1.98532	0.997	63.217	79005000	0.5016	0.208544	0.108436	46674	0.0865854
湖北	hubei	17	2017	7.31246	0.2629	0.0161203	56.0131	1.66626	0.999	46.7952	48684000	0.593	0.158183	0.122319	60199	0.162006
湖南	hunan	18	2017	4.78401	0.26012	0.0138825	53.0589	0.76862	0.998	41.4397	56647000	0.5462	0.18407	0.121719	49558	0.118128
广东	guangdong	19	2017	9.09467	0.177825	0.0148746	95.9531	0.689715	0.98	33.8232	91922000	0.6985	0.168317	0.0774679	80932	0.140362
广西	guangxi	20	2017	6.4628	0.223103	0.0181255	49.0638	1.61025	0.999	37.3902	40385000	0.4921	0.222583	0.0974619	38102	0.0765433
海南	hainan	21	2017	6.5445	0.152487	0.0124738	57.6976	0.57199	1	22.8101	7640000	0.5804	0.198168	0.0819372	48430	0.131192
重庆	chongqing	22	2017	6.157	0.271184	0.0213403	79.2031	0.766863	0.994	39.6363	25337000	0.6408	0.16395	0.142795	63442	0.136492
四川	sichuan	23	2017	7.06904	0.265956	0.0156058	52.8266	2.00498	0.985	23.5203	68609000	0.5079	0.158288	0.139297	44651	0.106894
贵州	guizhou	24	2017	5.13305	0.247467	0.04201	39.8545	3.15852	0.952	29.7494	29612000	0.4602	0.21292	0.0994867	37956	0.0957143
云南	yunnan	25	2017	6.42172	0.22471	0.0220957	46.6171	3.4564	0.927	16.7146	39709000	0.4669	0.189327	0.0840112	34221	0.0850779
西藏	xizang	26	2017	5.72041	0.118699	0.0144083	25.6561	1.36575	0.954	14.7118	2797000	0.3089	0.2399	0.0579192	39267	0.0837321
陕西	shaanxi	27	2017	6.06654	0.237417	0.0270435	55.5958	3.18525	0.99	36.7202	31649000	0.5679	0.15634	0.110967	57266	0.152812
甘肃	gansu	28	2017	6.21547	0.201427	0.0298527	29.7026	2.4558	0.984	48.3173	21720000	0.4639	0.17546	0.103269	28497	0.139001
青海	qinghai	29	2017	5.06175	0.197003	0.0595667	54.8998	26.313	0.948	48.3173	4939000	0.5307	0.200445	0.0789634	44047	0.116526
宁夏	ningxia	30	2017	7.10858	0.208992	0.0989693	54.6206	8.66714	0.991	39.5869	5627000	0.5798	0.183757	0.0845921	50765	0.157168
新疆	xinjiang	31	2017	5.54181	0.271252	0.0647254	50.1192	4.56358	0.886	58.0788	20210000	0.4938	0.228798	0.0728352	44941	0.180863
北京	beijing	1	2016	12.7951	0.172011	0.00903375	91.7819	0.346901	0.998	47.2486	18132000	0.865	0.108813	0.117417	118198	0.45462
天津	tianjing	2	2016	9.19822	0.124253	0.0224897	70.1625	1.14211	0.942	67.4044	13046000	0.8293	0.108922	0.113598	115053	0.256108
河北	hebei	3	2016	6.93227	0.178123	0.0505625	46.0231	5.29657	0.978	49.4136	62750000	0.5332	0.184606	0.109084	43062	0.103068
山西	shanxi	4	2016	4.17341	0.139139	0.0660207	45.0634	9.33193	0.946	37.4013	30910000	0.5621	0.153575	0.0869621	35532	0.135653
内蒙古	neimenggu	5	2016	4.8732	0.155886	0.0884746	49.5344	11.7156	0.989	20.8064	21136000	0.6119	0.127981	0.0943887	72064	0.182795
辽宁	liaoning	6	2016	5.26344	0.188876	0.0483282	62.2346	6.22396	0.933	33.1545	36668000	0.6737	0.10636	0.132241	50791	0.180191
吉林	jilin	7	2016	4.70691	0.160745	0.0308346	42.3068	1.74591	0.863	28.2965	22945000	0.5597	0.12652	0.10852	53868	0.141491
黑龙江	heilongjiang	8	2016	3.73345	0.176991	0.0415699	43.4006	2.17732	0.806	19.7998	31874000	0.592	0.100521	0.119376	40432	0.134735
上海	shanghai	9	2016	12.8294	0.181598	0.015851	109.352	0.832178	1	45.4405	20188000	0.879	0.0967406	0.129631	116562	0.300457
江苏	jiangsu	10	2016	8.23905	0.195373	0.0294352	92.0362	1.73871	0.999	54.5535	66998000	0.6772	0.137303	0.135049	96887	0.166124
浙江	zhejiang	11	2016	11.8511	0.18605	0.0177468	92.0025	0.910294	1	27.6662	46831000	0.67	0.129466	0.116355	84916	0.151886
安徽	anhui	12	2016	5.05225	0.172376	0.0213328	46.2321	2.43065	0.999	47.9474	52056000	0.5199	0.17535	0.114665	39561	0.0937052
福建	fujian	13	2016	6.74386	0.164759	0.021217	72.9864	1.37002	0.984	17.8426	32474000	0.636	0.182916	0.099495	74707	0.115232
江西	jiangxi	14	2016	5.52157	0.193247	0.0266824	57.3134	3.28313	0.95	32.2114	38576000	0.531	0.21223	0.0959664	40400	0.089761
山东	shandong	15	2016	7.45231	0.202696	0.0387916	60.8156	2.69697	1	62.9472	83464000	0.5902	0.169414	0.116517	68733	0.122799
河南	henan	16	2016	7.21238	0.199878	0.020599	50.1691	1.77889	0.988	58.392	80140000	0.485	0.207874	0.100761	42575	0.0796008
湖北	hubei	17	2016	7.18856	0.242502	0.0192937	55.6429	1.65904	0.958	42.7145	49384000	0.581	0.154807	0.115746	55665	0.139249
湖南	hunan	18	2016	4.60653	0.244448	0.0179637	52.13	0.928285	0.999	37.2696	57310000	0.5275	0.18201	0.118897	46382	0.116462
广东	guangdong	19	2016	8.81583	0.167944	0.0160476	101.866	0.609074	0.962	24.7339	92107000	0.692	0.167381	0.0769323	74016	0.138303
广西	guangxi	20	2016	6.24431	0.21151	0.0188288	47.4927	1.70563	0.99	27.4326	40677000	0.4808	0.213536	0.0969344	38027	0.0798508
海南	hainan	21	2016	6.36529	0.142946	0.0129644	57.2837	0.428683	0.999	12.3979	7698000	0.5678	0.197454	0.082489	44347	0.0973426
重庆	chongqing	22	2016	5.82942	0.247015	0.0235446	79.0536	0.917058	1	36.9179	25560000	0.626	0.154499	0.139671	58502	0.126126
四川	sichuan	23	2016	6.68039	0.238415	0.0174496	50.7978	1.69385	0.986	18.5107	69457000	0.4921	0.15961	0.136962	40003	0.089934
贵州	guizhou	24	2016	4.61307	0.22127	0.0410931	33.6687	2.59168	0.947	24.1404	29915000	0.4415	0.222731	0.0962393	33246	0.0701089
云南	yunnan	25	2016	6.10349	0.20414	0.0304103	45.1132	3.26898	0.93	12.6113	40141000	0.4503	0.195287	0.0837548	31093	0.0869212
西藏	xizang	26	2016	5.01972	0.12327	0.0276443	22.0258	1.52743	0.912	9.55559	2789000	0.2956	0.240588	0.0498387	35184	0.0525478
陕西	shaanxi	27	2016	5.77872	0.21261	0.0307897	52.0288	2.70132	0.985	33.5132	32014000	0.5534	0.148373	0.107422	51015	0.127873
甘肃	gansu	28	2016	5.91985	0.18224	0.0323452	30.2026	2.31831	0.728	34.5348	21960000	0.4469	0.169627	0.0995446	27643	0.107166
青海	qinghai	29	2016	4.81251	0.182835	0.0714859	54.6922	29.4145	0.963	34.5348	4987000	0.5163	0.197112	0.0721877	43531	0.0969221
宁夏	ningxia	30	2016	6.70667	0.188352	0.112231	59.917	6.38546	0.983	34.2463	5666000	0.5629	0.191493	0.0778327	47194	0.153743
新疆	xinjiang	31	2016	5.40541	0.265366	0.0762311	46.5693	4.2301	0.833	50.9258	20165000	0.4835	0.225192	0.0723035	40564	0.137281
北京	beijing	1	2015	0.649244	0.0082317	0.000768967	4.51889	0.0211451	0.788	50.7816	335775000	0.865	0.10124	0.106545	106497	0.42335
天津	tianjing	2	2015	0.497138	0.00629987	0.00222835	3.88553	0.0645862	0.927	69.8971	239370000	0.8264	0.10132	0.102941	107960	0.233308
河北	hebei	3	2015	0.364331	0.00857866	0.00349152	2.68764	0.306107	0.96	51.6946	1155542000	0.5133	0.182298	0.101742	40255	0.102077
山西	shanxi	4	2015	0.219494	0.00669721	0.00614637	2.55056	0.558288	0.972	40.0289	569491000	0.5503	0.150491	0.0918785	34919	0.137421
内蒙古	neimenggu	5	2015	0.256264	0.00758286	0.00832526	2.84097	0.683431	0.977	24.0517	390222000	0.603	0.1307	0.0955559	71101	0.161444
辽宁	liaoning	6	2015	0.273184	0.00949389	0.0041079	3.81937	0.476369	0.952	42.9134	680859000	0.6735	0.106072	0.128654	65354	0.169306
吉林	jilin	7	2015	0.245035	0.00796712	0.00306153	2.9616	0.125668	0.847	37.5526	428511000	0.5531	0.119836	0.109143	51086	0.131684
黑龙江	heilongjiang	8	2015	0.194026	0.00868729	0.00294447	2.50707	0.126454	0.782	24.3442	592705000	0.588	0.105742	0.108383	39462	0.132836
上海	shanghai	9	2015	0.689921	0.00896095	0.00158334	5.99394	0.0499524	1	54.209	373956000	0.876	0.0934201	0.128186	103796	0.286961
江苏	jiangsu	10	2015	0.440966	0.00983369	0.00206527	5.01782	0.0864244	1	61.7776	1238192000	0.6652	0.135599	0.126907	87995	0.164191
浙江	zhejiang	11	2015	0.616442	0.00920243	0.00171638	5.04577	0.0521766	0.992	34.0924	859773000	0.658	0.12914	0.112652	77644	0.146631
安徽	anhui	12	2015	0.276195	0.00881942	0.0018277	2.93589	0.136623	0.996	53.552	955845000	0.505	0.177716	0.111833	35997	0.117283
福建	fujian	13	2015	0.355571	0.00877187	0.00177551	4.30825	0.0831231	0.992	20.0948	596224000	0.626	0.175719	0.0900568	67966	0.13002
江西	jiangxi	14	2015	0.29273	0.0100218	0.00211301	3.14167	0.151671	0.945	34.294	710552000	0.5162	0.21468	0.0906169	36724	0.105709
山东	shandong	15	2015	0.40176	0.00994145	0.00263405	3.65771	0.129334	1	68.931	1530763000	0.5701	0.163537	0.11659	64168	0.126324
河南	henan	16	2015	0.376654	0.0101724	0.00220356	2.9366	0.0997321	0.96	65.6592	1476154000	0.4685	0.209863	0.0985094	39123	0.0874354
湖北	hubei	17	2015	0.382724	0.0121801	0.00166386	3.45095	0.0852331	0.915	50.277	909271000	0.5685	0.151794	0.112338	50654	0.149869
湖南	hunan	18	2015	0.243339	0.0123478	0.00146467	2.97411	0.0674722	0.998	42.557	1056139000	0.5089	0.184105	0.112233	42754	0.118907
广东	guangdong	19	2015	0.467394	0.00857186	0.00120297	5.42036	0.0333538	0.916	28.9715	1681666000	0.6871	0.160168	0.073715	67503	0.119858
广西	guangxi	20	2015	0.337307	0.0111258	0.00153997	2.94563	0.0933886	0.987	32.6605	747093000	0.4706	0.226245	0.0976318	35190	0.0920779
海南	hainan	21	2015	0.324868	0.00738721	0.00100427	2.763	0.0298031	0.998	14.8572	141596000	0.5512	0.198155	0.0844233	40818	0.108534
重庆	chongqing	22	2015	0.309457	0.0126152	0.00218882	3.19699	0.0603547	0.986	39.6229	468563000	0.6094	0.156011	0.132921	52321	0.125595
四川	sichuan	23	2015	0.353092	0.01211	0.00129657	2.67447	0.096423	0.968	18.779	1277289000	0.4769	0.158798	0.129394	36775	0.109947
贵州	guizhou	24	2015	0.239925	0.0115219	0.0028313	2.05032	0.128233	0.938	28.356	550172000	0.4201	0.22441	0.0947867	29847	0.0845391
云南	yunnan	25	2015	0.308687	0.0101393	0.00182193	2.34674	0.19102	0.9	13.0978	738612000	0.4333	0.191165	0.0840604	28806	0.0948014
西藏	xizang	26	2015	0.276494	0.00572738	0.00148517	1.16187	0.0789983	0.85	7.87706	50634000	0.2774	0.235652	0.0570763	31999	0.071136
陕西	shaanxi	27	2015	0.296939	0.0106135	0.0033359	2.85269	0.158311	0.98	35.8659	589346000	0.5392	0.150485	0.103494	47626	0.177425
甘肃	gansu	28	2015	0.308746	0.00868936	0.00309562	1.65666	0.143851	0.642	34.8635	404863000	0.4319	0.170986	0.0936416	26165	0.125192
青海	qinghai	29	2015	0.251062	0.00918012	0.00561832	2.58299	1.62295	0.872	34.8635	91611000	0.503	0.200642	0.070974	41252	0.104504
宁夏	ningxia	30	2015	0.346754	0.00943941	0.00919958	3.08467	0.33038	0.899	36.7045	103820000	0.5523	0.200944	0.0736178	43805	0.152419
新疆	xinjiang	31	2015	0.280172	0.0139324	0.00574135	2.71881	0.197562	0.809	54.637	367631000	0.4723	0.2182	0.0712862	40036	0.145493
北京	beijing	1	2014	12.0516	0.151946	0.0161795	84.8758	0.574849	0.996	52.1714	17757000	0.8635	0.101599	0.0854922	99995	0.381507
天津	tianjing	2	2014	9.2674	0.118774	0.0504114	71.3917	1.38581	0.967	77.0903	12517000	0.8227	0.107836	0.116782	105231	0.228488
河北	hebei	3	2014	6.7776	0.160929	0.0738496	50.8442	6.88059	0.866	53.8986	60936000	0.4933	0.186212	0.0932454	39984	0.0794235
山西	shanxi	4	2014	4.2515	0.129963	0.125715	48.1725	10.0305	0.921	39.2842	30107000	0.5379	0.148414	0.085235	35070	0.0984731
内蒙古	neimenggu	5	2014	4.8377	0.145358	0.17378	54.142	11.2192	0.961	22.4366	20671000	0.5951	0.135594	0.0933146	71046	0.108936
辽宁	liaoning	6	2014	5.10542	0.175281	0.083268	72.5464	7.91101	0.916	40.362	36236000	0.6705	0.10263	0.121616	65201	0.172139
吉林	jilin	7	2014	4.66652	0.147709	0.0614836	53.7843	2.17658	0.619	34.7141	22715000	0.5481	0.122171	0.101699	50160	0.118818
黑龙江	heilongjiang	8	2014	3.82524	0.15477	0.0631101	47.3078	1.99553	0.589	25.7542	31632000	0.5801	0.115864	0.0939239	39226	0.123511
上海	shanghai	9	2014	12.5381	0.159124	0.0330986	110.475	0.961482	1	51.8373	20019000	0.896	0.101104	0.096808	97370	0.271254
江苏	jiangsu	10	2014	8.00706	0.17537	0.0441606	91.5116	1.66302	0.981	63.3873	65692000	0.6521	0.137627	0.120639	81874	0.14279
浙江	zhejiang	11	2014	11.0876	0.166376	0.036114	92.0147	0.999146	1	38.1902	45456000	0.6487	0.12027	0.0962249	73002	0.151009
安徽	anhui	12	2014	5.23894	0.163614	0.0389056	54.2445	2.39039	0.995	60.6642	50201000	0.4915	0.178801	0.104201	34425	0.104861
福建	fujian	13	2014	6.74966	0.169923	0.0361552	82.9632	1.53934	0.979	21.6341	31409000	0.618	0.175957	0.0758651	63472	0.116871
江西	jiangxi	14	2014	5.62877	0.185843	0.0409966	55.5645	2.88673	0.931	40.0629	37486000	0.5022	0.207443	0.0924103	34674	0.0814907
山东	shandong	15	2014	7.81057	0.185896	0.0543596	63.6757	2.37652	1	70.1318	80788000	0.5501	0.157845	0.114708	60879	0.0982119
河南	henan	16	2014	7.06278	0.185828	0.0449745	54.2976	2.04402	0.928	66.451	77873000	0.452	0.209277	0.0875913	37072	0.103618
湖北	hubei	17	2014	7.18795	0.219482	0.0347522	62.8589	1.66809	0.902	54.183	47997000	0.5567	0.159777	0.102546	47145	0.114299
湖南	hunan	18	2014	4.51439	0.220617	0.0300845	55.7482	1.24708	0.997	49.9414	55600000	0.4928	0.183022	0.108723	40271	0.0919923
广东	guangdong	19	2014	8.82456	0.157378	0.026007	102.266	0.640101	0.864	32.53	88503000	0.68	0.164697	0.0827326	63469	0.0937839
广西	guangxi	20	2014	6.34686	0.212271	0.0334395	55.8993	2.04872	0.954	36.4106	39232000	0.4601	0.218968	0.095351	33090	0.0800639
海南	hainan	21	2014	6.03541	0.130231	0.0202253	52.7776	0.691282	0.998	13.2499	7456000	0.5376	0.190451	0.0765826	38924	0.0813068
重庆	chongqing	22	2014	5.58999	0.223328	0.0448819	59.0683	1.24267	0.992	41.4552	24687000	0.596	0.152584	0.141243	47850	0.128573
四川	sichuan	23	2014	6.62409	0.224593	0.0269489	49.3126	2.12066	0.954	20.7388	67179000	0.463	0.162149	0.139895	35128	0.0906074
贵州	guizhou	24	2014	4.4905	0.221119	0.0619965	38.3116	2.55413	0.933	30.1671	28950000	0.4001	0.220994	0.0922248	26437	0.10381
云南	yunnan	25	2014	5.62953	0.187278	0.0386201	40.4977	3.72234	0.925	12.9068	38902000	0.4173	0.189553	0.0872192	27264	0.0680948
西藏	xizang	26	2014	4.96183	0.0875191	0.0253435	20.8015	1.46218	0.85	9.59434	2620000	0.2575	0.245708	0.0549409	29252	0.026035
陕西	shaanxi	27	2014	5.61708	0.191196	0.0704831	46.7935	2.78687	0.958	36.937	31155000	0.5257	0.149066	0.106118	46929	0.110436
甘肃	gansu	28	2014	5.75277	0.15837	0.0626631	30.8559	2.87196	0.626	52.2967	21381000	0.4168	0.163704	0.0893358	26433	0.103133
青海	qinghai	29	2014	4.77773	0.179643	0.109826	47.7794	25.8066	0.863	52.2967	4814000	0.4978	0.18297	0.071028	39671	0.128223
宁夏	ningxia	30	2014	6.59341	0.17663	0.186868	68.2729	6.7654	0.933	40.9595	5460000	0.5361	0.197289	0.067778	41834	0.106677
新疆	xinjiang	31	2014	5.27176	0.258754	0.13336	54.1663	4.10653	0.819	64.4491	18969000	0.4607	0.211303	0.0686946	40648	0.132471
北京	beijing	1	2013	11.7452	0.14112	0.0179099	82.8349	0.598212	0.993	55.0003	17454000	0.863	0.0992323	0.0858256	93213	0.412076
天津	tianjing	2	2013	8.64198	0.11186	0.0506996	69.3086	1.31038	0.968	82.5889	12150000	0.8201	0.111852	0.114568	99607	0.23053
河北	hebei	3	2013	6.49404	0.152441	0.0702365	51.3775	7.15316	0.833	58.2206	60517000	0.4812	0.178	0.0916602	38716	0.0773416
山西	shanxi	4	2013	4.17265	0.122512	0.114828	46.076	10.1881	0.879	45.7085	29957000	0.5256	0.157225	0.0797143	34813	0.107163
内蒙古	neimenggu	5	2013	4.80279	0.137593	0.172629	51.8702	9.74171	0.936	22.7542	20613000	0.5871	0.137341	0.08548	67498	0.100805
辽宁	liaoning	6	2013	4.91292	0.164249	0.0732246	64.7258	7.38579	0.876	35.6008	36231000	0.6645	0.104165	0.10215	61686	0.198253
吉林	jilin	7	2013	4.49201	0.135518	0.0555864	51.8356	2.0219	0.609	28.6676	22707000	0.542	0.117541	0.0965781	47191	0.115611
黑龙江	heilongjiang	8	2013	3.82294	0.14888	0.0620265	48.3681	1.92553	0.544	18.1949	31651000	0.574	0.119807	0.0894127	37509	0.122441
上海	shanghai	9	2013	11.7399	0.146016	0.0339705	111.862	1.03075	0.906	52.4961	19932000	0.896	0.0936183	0.106412	90092	0.246928
江苏	jiangsu	10	2013	7.53899	0.160805	0.0424213	90.7058	1.65673	0.974	61.2083	65526000	0.6411	0.133275	0.122547	74607	0.137299
浙江	zhejiang	11	2013	10.4681	0.151957	0.0367176	92.366	0.947545	0.994	36.9674	45376000	0.64	0.11938	0.091987	68462	0.173315
安徽	anhui	12	2013	5.12408	0.153236	0.0190174	53.4982	2.39862	0.988	55.3104	49765000	0.4786	0.184588	0.105315	31684	0.0915353
福建	fujian	13	2013	6.54938	0.169407	0.0339893	83.1829	2.7402	0.982	20.1536	31148000	0.6077	0.168518	0.0816425	57856	0.0889462
江西	jiangxi	14	2013	5.33212	0.184523	0.0397739	55.5017	3.08625	0.933	36.1087	37321000	0.4887	0.19702	0.0900297	31771	0.0938973
山东	shandong	15	2013	7.74296	0.176126	0.0497068	61.5665	2.2622	0.995	72.3543	80331000	0.5375	0.15476	0.109821	56323	0.0989342
河南	henan	16	2013	6.68057	0.170863	0.0445487	53.1076	2.09428	0.9	74.5989	77688000	0.438	0.207664	0.0892673	34174	0.0809124
湖北	hubei	17	2013	6.70706	0.198989	0.0328312	61.4405	1.70928	0.854	52.3702	47860000	0.5451	0.149457	0.0990598	42613	0.119202
湖南	hunan	18	2013	4.41877	0.210208	0.0287618	55.6379	1.41359	0.96	45.4306	55219000	0.4796	0.182691	0.105706	36763	0.0849786
广东	guangdong	19	2013	8.62864	0.147707	0.0264107	98.1788	0.67297	0.846	29.341	87847000	0.6776	0.166801	0.0724441	58540	0.0819561
广西	guangxi	20	2013	6.41898	0.210222	0.0325006	57.8486	1.97079	0.964	35.9016	38947000	0.4481	0.214676	0.0929468	30588	0.0769881
海南	hainan	21	2013	5.68413	0.123088	0.0203816	48.9322	0.561497	0.999	15.1677	7389000	0.5274	0.187441	0.0814725	35317	0.0877868
重庆	chongqing	22	2013	5.67069	0.206899	0.0449127	58.1491	1.2899	0.994	45.3993	24512000	0.5834	0.156005	0.132466	42795	0.0936133
四川	sichuan	23	2013	6.50185	0.217005	0.0259626	45.9835	2.09354	0.95	22.8718	66904000	0.449	0.165506	0.127586	32454	0.105355
贵州	guizhou	24	2013	4.3937	0.226092	0.0638298	32.2038	2.83482	0.922	30.3537	28905000	0.3783	0.220896	0.0927867	22922	0.0909159
云南	yunnan	25	2013	5.45502	0.174517	0.0406851	40.4816	4.14684	0.876	16.2932	38680000	0.4048	0.200233	0.0801189	25083	0.0775601
西藏	xizang	26	2013	4.66019	0.0756117	0.0214757	19.4369	1.40396	0.85	7.49577	2575000	0.2371	0.232621	0.0516505	26068	0.023913
陕西	shaanxi	27	2013	5.53713	0.176213	0.0676947	42.5487	2.41158	0.964	43.2815	31063000	0.5131	0.150823	0.0982841	42692	0.119852
甘肃	gansu	28	2013	5.81859	0.149603	0.0577871	30.4861	2.77191	0.423	41.2435	21311000	0.4013	0.169068	0.0889212	24296	0.0902074
青海	qinghai	29	2013	4.61313	0.172636	0.0970434	46.0327	25.9538	0.778	41.2435	4769000	0.4851	0.198784	0.0715035	36510	0.125739
宁夏	ningxia	30	2013	6.11224	0.168013	0.195907	71.3614	6.06936	0.925	46.5597	5399000	0.5201	0.202445	0.0707538	39420	0.112497
新疆	xinjiang	31	2013	5.02997	0.248314	0.132288	53.8955	4.96739	0.781	56.7867	18688000	0.4447	0.208315	0.0636772	37181	0.128502
北京	beijing	1	2012	10.7147	0.13032	0.0195818	81.2429	0.639436	0.991	44.9137	17266000	0.862	0.0937681	0.0860072	87475	0.373503
天津	tianjing	2	2012	8.1418	0.112077	0.0545162	70.2341	1.54355	0.998	60.2277	11791000	0.8155	0.117293	0.104571	93173	0.228456
河北	hebei	3	2012	6.05203	0.143012	0.0713449	50.2866	7.49529	0.814	47.4414	60806000	0.468	0.179456	0.0909285	36584	0.0578755
山西	shanxi	4	2012	3.94981	0.115859	0.120044	44.5758	9.63605	0.803	38.643	30128000	0.5126	0.157063	0.0796601	33628	0.0953572
内蒙古	neimenggu	5	2012	4.47653	0.124491	0.175057	49.3016	11.661	0.912	19.2069	20775000	0.5774	0.138532	0.0787485	63886	0.120625
辽宁	liaoning	6	2012	4.77868	0.150307	0.0770405	65.2	7.44921	0.872	27.1909	36621000	0.6565	0.10382	0.0993692	56649	0.184999
吉林	jilin	7	2012	4.22676	0.131792	0.0542159	52.0759	2.06148	0.458	20.857	22949000	0.537	0.122445	0.077389	43415	0.089683
黑龙江	heilongjiang	8	2012	3.59487	0.131319	0.0623382	50.8249	1.97329	0.476	13.5032	31990000	0.569	0.121225	0.0883714	35711	0.101052
上海	shanghai	9	2012	11.1268	0.139326	0.036094	110.384	1.10704	0.836	41.3761	19862000	0.893	0.084634	0.0901218	85373	0.230745
江苏	jiangsu	10	2012	6.82475	0.144197	0.0441082	90.5242	1.54721	0.959	49.408	66083000	0.63	0.131668	0.114961	68347	0.134549
浙江	zhejiang	11	2012	9.89059	0.137057	0.0369497	92.114	0.976241	0.99	34.0167	45700000	0.632	0.12337	0.0874836	63374	0.149544
安徽	anhui	12	2012	4.70348	0.142435	0.0380882	50.9035	2.40625	0.911	47.4335	49963000	0.465	0.181114	0.103176	28792	0.102543
福建	fujian	13	2012	6.13948	0.163131	0.0348895	81.9438	2.46844	0.964	19.9864	31273000	0.596	0.167205	0.0859208	52763	0.078186
江西	jiangxi	14	2012	5.05588	0.175059	0.0399734	53.5365	2.96264	0.891	35.8526	37580000	0.4751	0.215141	0.0808941	28800	0.0828578
山东	shandong	15	2012	7.21445	0.172934	0.0517646	59.2872	2.26984	0.981	62.1139	80810000	0.5243	0.161379	0.105136	51768	0.0976771
河南	henan	16	2012	6.33258	0.162219	0.044616	51.4338	1.94316	0.864	61.6067	78483000	0.4243	0.205509	0.0882102	31499	0.0666
湖北	hubei	17	2012	6.34605	0.178784	0.0334329	60.1837	1.57841	0.715	46.7467	48219000	0.535	0.140857	0.107613	38572	0.122237
湖南	hunan	18	2012	4.13402	0.190169	0.0287558	54.9182	1.46513	0.95	47.653	55394000	0.4665	0.186464	0.111059	33480	0.0733674
广东	guangdong	19	2012	8.08869	0.137542	0.0275004	94.8641	0.674867	0.791	29.4665	88395000	0.674	0.163708	0.069823	54095	0.0976188
广西	guangxi	20	2012	5.93867	0.179061	0.0333308	62.8623	2.03859	0.98	37.4929	39066000	0.4353	0.225874	0.093278	27952	0.0648288
海南	hainan	21	2012	5.27241	0.113762	0.0208328	50.1595	0.521455	0.999	10.4907	7397000	0.516	0.190888	0.0727322	32377	0.102466
重庆	chongqing	22	2012	5.41244	0.183022	0.0459773	53.8925	1.26761	0.993	45.3732	24573000	0.5698	0.164245	0.129044	38914	0.099744
四川	sichuan	23	2012	6.29211	0.205252	0.0269967	42.0944	1.95698	0.883	22.2351	67386000	0.4353	0.162304	0.11814	29608	0.0991555
贵州	guizhou	24	2012	3.95583	0.193774	0.0653263	31.4592	2.69521	0.919	33.8786	29071000	0.3641	0.229713	0.0915689	19710	0.0656581
云南	yunnan	25	2012	5.14483	0.159793	0.0413413	39.6177	4.12553	0.827	13.5248	38874000	0.3931	0.195581	0.0775583	22195	6.76978e-06
西藏	xizang	26	2012	3.8956	0.056681	0.0214647	18.2431	1.42571	0.85	7.33313	2567000	0.2275	0.22088	0.0541488	22936	0.0424528
陕西	shaanxi	27	2012	5.14131	0.159004	0.0675076	41.1142	2.30404	0.885	36.9343	31315000	0.5002	0.140604	0.092767	38564	0.106762
甘肃	gansu	28	2012	5.53308	0.136188	0.0582833	29.2058	3.10186	0.417	36.2863	21507000	0.3875	0.165528	0.0923885	21978	0.0890193
青海	qinghai	29	2012	4.39147	0.158846	0.0912589	45.9933	25.7239	0.892	36.2863	4782000	0.4744	0.20619	0.0700544	33181	0.0958314
宁夏	ningxia	30	2012	5.74074	0.151852	0.196352	72.1259	5.48272	0.706	36.0842	5400000	0.5067	0.213704	0.0662963	36394	0.0911107
新疆	xinjiang	31	2012	4.50886	0.240354	0.124085	50.3543	4.22959	0.787	51.0066	18630000	0.4398	0.204938	0.0679549	33796	0.134358
北京	beijing	1	2011	9.39348	0.116433	0.0204105	84.3494	0.652667	0.982	51.9046	17246000	0.862	0.0875565	0.0881944	81658	0.339397
天津	tianjing	2	2011	7.5149	0.101693	0.0575019	58.0003	1.51354	1	71.157	11577000	0.805	0.106504	0.0976937	85213	0.20991
河北	hebei	3	2011	5.41537	0.125441	0.0733208	45.0285	7.29515	0.726	50.5747	61861000	0.456	0.17604	0.0816831	33969	0.0536536
山西	shanxi	4	2011	3.55072	0.0993517	0.124275	37.8305	8.97645	0.775	41.4706	30698000	0.4968	0.161607	0.0776598	31357	0.081096
内蒙古	neimenggu	5	2011	4.15036	0.108324	0.168429	47.3466	11.123	0.835	19.8626	21203000	0.5662	0.136773	0.0689053	57974	0.126505
辽宁	liaoning	6	2011	4.11248	0.128173	0.0769674	62.0202	7.54923	0.805	32.1752	37447000	0.6405	0.113601	0.107726	50760	0.125327
吉林	jilin	7	2011	3.83142	0.113614	0.0617327	49.4517	2.28974	0.492	23.712	23490000	0.534	0.127246	0.0870158	38460	0.0908197
黑龙江	heilongjiang	8	2011	3.23595	0.112993	0.0598834	45.9935	1.83676	0.437	14.0334	32757000	0.565	0.117379	0.0799218	32819	0.0941737
上海	shanghai	9	2011	10.5205	0.12323	0.0381582	106.779	1.21769	0.61	47.1968	20056000	0.893	0.082868	0.0787296	82560	0.211802
江苏	jiangsu	10	2011	6.03097	0.123048	0.0461866	87.8379	1.55227	0.938	58.602	67485000	0.619	0.129881	0.108172	62290	0.120555
浙江	zhejiang	11	2011	8.76291	0.118211	0.0395166	90.0146	0.952511	0.964	34.0063	46674000	0.623	0.126087	0.0856794	59249	0.125583
安徽	anhui	12	2011	4.00086	0.11737	0.0380631	47.7093	2.25014	0.87	52.2595	50989000	0.448	0.180176	0.104768	25659	0.0683706
福建	fujian	13	2011	5.50609	0.138439	0.0348929	99.4802	1.38907	0.946	19.9797	31783000	0.581	0.1576	0.0767077	47377	0.121297
江西	jiangxi	14	2011	4.66778	0.146331	0.041525	50.702	2.96559	0.883	35.1341	38348000	0.457	0.214718	0.076223	26150	0.0725214
山东	shandong	15	2011	6.29129	0.146196	0.0534578	53.8441	2.3723	0.925	64.5441	82336000	0.5095	0.155278	0.107535	47335	0.0895202
河南	henan	16	2011	5.79743	0.135765	0.0461812	47.2253	1.817	0.844	66.4032	80208000	0.4057	0.207361	0.0879837	28661	0.0764442
湖北	hubei	17	2011	5.44826	0.145097	0.0341797	59.578	1.54417	0.61	52.6843	49190000	0.5183	0.143058	0.101118	34197	0.112384
湖南	hunan	18	2011	3.85086	0.161621	0.0308122	49.4776	1.50605	0.864	46.065	56351000	0.451	0.179003	0.104807	29880	0.07919
广东	guangdong	19	2011	7.27577	0.121003	0.0285259	87.5306	0.651689	0.721	29.6438	89750000	0.665	0.172323	0.0655599	50807	0.105742
广西	guangxi	20	2011	5.16555	0.14964	0.0328403	56.0497	1.87424	0.955	35.6898	39686000	0.418	0.219624	0.0953989	25326	0.0879987
海南	hainan	21	2011	4.93597	0.102468	0.0191836	47.6588	0.561313	0.914	15.4078	7496000	0.505	0.199173	0.0688367	28898	0.0768444
重庆	chongqing	22	2011	5.01223	0.148414	0.0469345	52.7086	1.3229	0.996	45.0382	24939000	0.5502	0.160431	0.124183	34500	0.115061
四川	sichuan	23	2011	5.65596	0.163555	0.0285386	40.6898	1.84429	0.884	23.184	68777000	0.4183	0.161987	0.120345	26133	0.082981
贵州	guizhou	24	2011	3.64422	0.149555	0.0661695	26.2947	2.56385	0.886	33.0879	29636000	0.3496	0.241632	0.0910379	16413	0.0824012
云南	yunnan	25	2011	4.54959	0.13028	0.0409943	37.2872	4.38158	0.741	16.0379	39564000	0.368	0.195733	0.0768628	19265	0.0697858
西藏	xizang	26	2011	4.24547	0.0622154	0.0211501	17.8888	1.16322	0.85	7.25003	2591000	0.2271	0.230799	0.0482439	20077	0.0496815
陕西	shaanxi	27	2011	4.5972	0.127436	0.0691738	38.0958	2.22593	0.903	39.5258	31976000	0.473	0.150206	0.0849074	33464	0.101552
甘肃	gansu	28	2011	4.88406	0.108873	0.0612105	27.0367	2.97781	0.417	38.1347	21908000	0.3715	0.168751	0.0890542	19595	0.0883827
青海	qinghai	29	2011	4.32633	0.131788	0.0863206	43.8649	24.7573	0.895	38.1347	4854000	0.4622	0.205604	0.0593325	29522	0.0909295
宁夏	ningxia	30	2011	5.12539	0.129013	0.198444	72.1801	6.1214	0.67	37.3588	5463000	0.4982	0.209226	0.0547318	33043	0.0895937
新疆	xinjiang	31	2011	4.08033	0.211186	0.108638	44.1572	2.76567	0.795	51.1753	18871000	0.4354	0.199459	0.0660802	30087	0.141453
北京	beijing	1	2010	74.6332	0.934127	0.0919626	695.569	6.47053	0.9695	46.3367	1961200	0.856	0.0860698	0.0871405	75943	0.31499
天津	tianjing	2	2010	57.9458	0.844787	0.237801	527.089	14.3915	1	70.0698	1.29382e+06	0.79255	0.0979662	0.0852007	72994	0.174802
河北	hebei	3	2010	43.5851	1.02416	0.285915	365.383	44.1004	0.6982	49.7771	7.18542e+06	0.443	0.1683	0.0823852	28668	0.0729604
山西	shanxi	4	2010	30.5307	0.812274	0.625873	331.257	51.1591	0.7358	40.6807	3.57121e+06	0.47835	0.170979	0.0757539	26283	0.08721
内蒙古	neimenggu	5	2010	33.9804	0.87595	0.891039	374.592	68.7921	0.828	22.2728	2.47063e+06	0.5501	0.14096	0.0756145	47347	0.102077
辽宁	liaoning	6	2010	33.6234	1.0221	0.416684	498.76	39.4845	0.7088	35.5322	4.37463e+06	0.622	0.114226	0.103082	42355	0.11965
吉林	jilin	7	2010	31.3655	0.900677	0.258573	416.684	16.9032	0.4451	27.6377	2.74623e+06	0.5336	0.119897	0.0838471	31599	0.0989
黑龙江	heilongjiang	8	2010	27.4322	0.974036	0.252891	309.497	14.1078	0.4036	16.7884	3.83122e+06	0.56	0.119555	0.0832195	27076	0.09067
上海	shanghai	9	2010	87.0577	1.00987	0.204154	1078.45	10.6346	0.8186	49.1278	2.30191e+06	0.8895	0.0862601	0.101213	76074	0.219516
江苏	jiangsu	10	2010	48.9011	0.944257	0.195384	706.205	11.523	0.9358	61.8467	7.86599e+06	0.5875	0.130056	0.108922	52840	0.108147
浙江	zhejiang	11	2010	66.3271	0.917513	0.182259	725.428	7.84171	0.983	36.2254	5442690	0.601	0.132089	0.0933674	51711	0.0933
安徽	anhui	12	2010	33.3678	0.926236	0.176667	310.415	15.3913	0.6456	56.7888	5950100	0.4345	0.179812	0.101797	20888	0.06697
福建	fujian	13	2010	44.4716	1.09028	0.186436	646.448	20.2932	0.9196	21.0089	3.68942e+06	0.5475	0.15465	0.0789322	40025	0.08361
江西	jiangxi	14	2010	35.088	1.12208	0.212047	360.489	21.1073	0.8589	37.8379	4.45675e+06	0.4444	0.218779	0.0759801	21253	0.0684741
山东	shandong	15	2010	50.1335	1.15527	0.221195	455.536	16.7423	0.919	72.2968	9579310	0.49635	0.157363	0.0984392	41106	0.0869445
河南	henan	16	2010	44.5395	1.09316	0.224644	381.478	11.395	0.8259	69.8709	9.40236e+06	0.39135	0.21001	0.0835833	24446	0.06398
湖北	hubei	17	2010	41.7914	1.13486	0.169845	473.036	11.903	0.6143	55.9535	5723774	0.48915	0.139131	0.0909209	27906	0.0953277
湖南	hunan	18	2010	31.6199	1.21461	0.229573	408.183	8.78909	0.7899	48.542	6.56837e+06	0.4415	0.176204	0.0978023	24719	0.0759487
广东	guangdong	19	2010	57.7266	0.984002	0.140539	693.151	5.23091	0.7212	31.3222	1.04303e+07	0.6495	0.168914	0.0674887	44736	0.08214
广西	guangxi	20	2010	42.5488	1.2823	0.322231	679.238	13.54	0.9114	35.2265	4602660	0.405	0.217079	0.0924074	20219	0.05977
海南	hainan	21	2010	38.7098	0.807027	0.050155	423.098	2.44479	0.6797	12.2662	867152	0.49815	0.200041	0.0779573	23831	0.07768
重庆	chongqing	22	2010	40.2963	1.16705	0.350378	444.124	9.83492	0.9882	51.1716	2884620	0.53305	0.169797	0.115582	27596	0.0864256
四川	sichuan	23	2010	44.9811	1.31603	0.200644	318.454	13.9757	0.8686	25.4635	8041820	0.40265	0.169669	0.109522	21182	0.0667541
贵州	guizhou	24	2010	29.5883	1.20867	0.428032	175.048	23.565	0.9064	33.3556	3.47465e+06	0.32425	0.252244	0.085684	13119	0.0529199
云南	yunnan	25	2010	38.318	1.05209	0.158961	200.131	20.4325	0.8828	14.6556	4596600	0.354	0.207284	0.0762738	15752	0.05778
西藏	xizang	26	2010	31.95	0.557507	0.0236396	127.408	0.366402	0.85	6.96661	300217	0.23255	0.243718	0.0509322	17319	0.0550709
陕西	shaanxi	27	2010	38.3945	0.990814	0.301991	309.888	18.4637	0.7984	40.397	3.73274e+06	0.454	0.147061	0.085295	27133	0.105561
甘肃	gansu	28	2010	39.2754	0.842303	0.315741	200.354	14.6431	0.3795	43.8139	2.55753e+06	0.349	0.181575	0.0823369	16113	0.0751996
青海	qinghai	29	2010	33.3426	0.974237	0.564236	401.815	31.6881	0.6728	43.8139	562672	0.4406	0.209199	0.0630353	24115	0.0861592
宁夏	ningxia	30	2010	41.1186	1.05104	0.862587	645.147	39.1186	0.9253	45.8769	630135	0.4796	0.214834	0.0641001	26860	0.09152
新疆	xinjiang	31	2010	34.095	1.61811	0.512124	383.664	17.9432	0.7058	58.0816	2.18133e+06	0.41695	0.207701	0.0619011	25034	0.10635
北京	beijing	1	2009	8.92914	0.113523	0.0119559	93.2783	0.823028	0.9822	53.1975	15096000	0.85	0.0991653	0.100954	70452	0.307719
天津	tianjing	2	2009	6.14881	0.098705	0.0301698	56.9535	1.44721	0.9431	78.233	10473000	0.7801	0.10064	0.110379	62574	0.170143
河北	hebei	3	2009	4.72978	0.110508	0.0353307	39.36	3.53065	0.59	54.149	62243000	0.43	0.165063	0.0885561	24581	0.0561685
山西	shanxi	4	2009	3.46063	0.0940272	0.0771295	34.8525	4.85313	0.6289	42.1912	30378000	0.4599	0.172526	0.0808809	21522	0.0766388
内蒙古	neimenggu	5	2009	3.69974	0.0925632	0.0956639	34.027	5.63204	0.7201	21.5891	21499000	0.534	0.142286	0.0845621	40282	0.0795343
辽宁	liaoning	6	2009	3.66098	0.110038	0.0492079	56.508	4.48136	0.5987	38.0369	38429000	0.6035	0.110411	0.114991	35239	0.118154
吉林	jilin	7	2009	3.38011	0.0948006	0.0333886	45.0592	1.61835	0.3839	29.8183	24349000	0.5332	0.121689	0.0888743	26595	0.0821947
黑龙江	heilongjiang	8	2009	2.82082	0.10092	0.0300714	32.4404	1.54843	0.2986	17.2205	34065000	0.555	0.123352	0.0866285	22447	0.0654564
上海	shanghai	9	2009	10.9488	0.127726	0.029085	137.099	1.3409	0.7877	55.9564	16814000	0.886	0.0755918	0.140835	78989	0.236561
江苏	jiangsu	10	2009	5.32009	0.0995459	0.0229334	76.3963	1.17415	0.9098	59.4725	68371000	0.556	0.136856	0.1203	44744	0.0776477
浙江	zhejiang	11	2009	7.38314	0.0992468	0.0232942	80.2729	0.859796	0.976	36.2071	45472000	0.579	0.138503	0.110727	44641	0.100447
安徽	anhui	12	2009	3.54548	0.100855	0.0201909	32.8894	1.55036	0.6091	54.636	54638000	0.421	0.192577	0.101486	16407.7	0.0465952
福建	fujian	13	2009	4.86938	0.120725	0.0214847	76.6466	1.97804	0.9253	21.9517	32097000	0.514	0.170764	0.100321	33840	0.0979556
江西	jiangxi	14	2009	3.90721	0.128035	0.0253103	37.534	2.27075	0.844	39.1818	39186000	0.4318	0.220028	0.0807686	17335	0.0685703
山东	shandong	15	2009	5.35708	0.119685	0.026567	46.1124	1.68576	0.9054	65.1589	83867000	0.4832	0.156581	0.0974281	35894	0.0600869
河南	henan	16	2009	4.63511	0.11386	0.0262123	39.7719	1.28442	0.7533	64.4129	83974000	0.377	0.191595	0.088837	20597	0.0515533
湖北	hubei	17	2009	4.29204	0.115745	0.0205164	52.2506	1.09344	0.5565	52.3328	50862000	0.46	0.144646	0.101746	22677	0.0763266
湖南	hunan	18	2009	3.42457	0.128525	0.030407	45.8075	0.896302	0.666	51.3483	56820000	0.432	0.172193	0.111774	20428	0.0613846
广东	guangdong	19	2009	6.5274	0.109322	0.0173809	80.8921	0.557872	0.6549	35.4447	84981000	0.634	0.17338	0.0747932	41166	0.0686879
广西	guangxi	20	2009	4.32099	0.129944	0.0376948	71.2287	1.32734	0.8632	38.8303	42891000	0.392	0.212679	0.0930965	16045	0.0409963
海南	hainan	21	2009	4.11165	0.0813055	0.00527821	49.3265	0.264078	0.6498	13.5798	7606000	0.4913	0.204181	0.0876939	19254	0.0687785
重庆	chongqing	22	2009	4.45152	0.124875	0.0413073	58.1667	1.00927	0.9588	47.6333	25284000	0.5159	0.183871	0.115765	22920	0.0549172
四川	sichuan	23	2009	4.8555	0.144899	0.0211651	36.2502	1.18625	0.835	22.2577	72471000	0.387	0.172096	0.121952	17339	0.056221
贵州	guizhou	24	2009	2.86096	0.123472	0.0507412	17.5131	2.16618	0.817	35.1899	33780000	0.2989	0.247987	0.0827117	10309	0.0331073
云南	yunnan	25	2009	4.10568	0.106119	0.0192636	21.6487	2.14356	0.8088	14.8073	40460000	0.34	0.215027	0.0859614	13539	0.0306367
西藏	xizang	26	2009	3.94943	0.062739	0.0020473	13.5181	0.0434899	0.6511	7.94676	2556000	0.238	0.197574	0.0700313	15295	0.0168421
陕西	shaanxi	27	2009	4.07091	0.102405	0.0344646	33.1957	1.65552	0.6916	39.4795	33504000	0.435	0.158339	0.0989434	21688	0.0909607
甘肃	gansu	28	2009	3.89515	0.0865542	0.0318641	21.0511	1.34596	0.3237	39.7253	23405000	0.3265	0.188849	0.083401	12872	0.0478593
青海	qinghai	29	2009	3.61577	0.106032	0.056889	44.935	2.7313	0.6511	39.7253	4934000	0.419	0.209566	0.069923	19454	0.0883578
宁夏	ningxia	30	2009	4.45571	0.110205	0.0814741	75.1026	2.54043	0.4196	44.166	5504000	0.461	0.213663	0.0679506	21777	0.083612
新疆	xinjiang	31	2009	3.88535	0.163656	0.0574959	40.6679	1.68928	0.6063	50.8345	18979000	0.3985	0.212024	0.0665999	19942	0.0950579
北京	beijing	1	2008	5.36906	0.0974489	0.0126102	76.4592	0.781071	0.9771	51.4062	14813000	0.849	0.0970769	0.102883	63029	0.281219
天津	tianjing	2	2008	0.313845	0.0762333	0.031416	60.5389	1.46233	0.9352	74.6367	10114000	0.7723	0.107475	0.1228	55473	0.154583
河北	hebei	3	2008	1.05411	0.0656223	0.0384352	37.2647	3.13888	0.5715	51.1646	62981000	0.419	0.160604	0.0873914	23239	0.0480822
山西	shanxi	4	2008	1.07406	0.0568723	0.0815914	34.735	5.26755	0.4747	40.4569	30779000	0.4511	0.182007	0.078755	20398	0.0719939
内蒙古	neimenggu	5	2008	1.16018	0.0569143	0.101739	32.2795	4.8689	0.5499	21.2636	21816000	0.5171	0.149019	0.0810873	32214	0.0741973
辽宁	liaoning	6	2008	1.56715	0.0762855	0.0536103	54.3811	4.06305	0.5978	36.7934	38988000	0.6005	0.121294	0.113343	31259	0.110048
吉林	jilin	7	2008	1.31417	0.0665098	0.0331062	43.5233	1.37902	0.3261	27.3201	24764000	0.5321	0.122315	0.0912615	23514	0.0756732
黑龙江	heilongjiang	8	2008	1.16435	0.0631308	0.0315574	31.9984	1.28921	0.2642	16.6214	34688000	0.554	0.127076	0.0911843	21727	0.0597321
上海	shanghai	9	2008	5.0307	0.101932	0.0332485	132.758	1.39255	0.7438	55.304	16854000	0.886	0.0790317	0.130414	73124	0.226617
江苏	jiangsu	10	2008	1.85197	0.0634261	0.0241485	73.6903	1.1167	0.9084	58.9418	69168000	0.543	0.137564	0.117366	39622	0.0704313
浙江	zhejiang	11	2008	2.83497	0.0781927	0.0236706	76.3349	0.824619	0.8957	41.3265	45900000	0.576	0.140196	0.106514	42214	0.0953037
安徽	anhui	12	2008	0.880726	0.051491	0.0210645	30.3921	1.36383	0.5395	57.9737	55498000	0.405	0.201142	0.107445	14485	0.0400995
福建	fujian	13	2008	1.56051	0.0596665	0.022074	72.734	1.65343	0.8797	23.8894	32484000	0.499	0.177441	0.0999569	30123	0.0586175
江西	jiangxi	14	2008	0.979204	0.0516158	0.0269225	35.0577	2.06698	0.7971	41.4893	39623000	0.4136	0.227015	0.0838402	14781	0.0639258
山东	shandong	15	2008	1.25977	0.0699079	0.0282128	42.2397	1.52854	0.7937	68.5074	84970000	0.476	0.155879	0.097505	33083	0.0546891
河南	henan	16	2008	1.08796	0.05716	0.0277043	36.4159	1.1256	0.6729	64.5323	84906000	0.3603	0.198431	0.0782395	19593	0.0471732
湖北	hubei	17	2008	1.25782	0.0611553	0.0215856	50.0752	0.969882	0.5298	53.1363	51697000	0.452	0.146836	0.101302	19860	0.0807552
湖南	hunan	18	2008	0.877964	0.0594785	0.0307473	43.4241	0.784069	0.5952	53.7314	57648000	0.4215	0.166719	0.105103	17521	0.0650907
广东	guangdong	19	2008	2.91987	0.0663537	0.019397	79.0247	0.563852	0.6387	36.0864	85714000	0.6337	0.184742	0.0755653	37589	0.0703538
广西	guangxi	20	2008	1.25093	0.0508702	0.0366869	79.8472	1.25243	0.823	40.1311	43252000	0.3816	0.218556	0.0935217	14966	0.0329421
海南	hainan	21	2008	12.8745	0.0509489	0.00524331	47.212	0.287019	0.6474	17.3787	7665000	0.48	0.215264	0.0894977	17175	0.0577387
重庆	chongqing	22	2008	1.18908	0.0519474	0.0438448	56.8068	0.904678	0.8838	47.7903	25545000	0.4999	0.190135	0.119593	18025	0.0424406
四川	sichuan	23	2008	1.1403	0.0554784	0.02189	35.5854	1.25295	0.8063	23.5469	73722000	0.374	0.173544	0.114484	15378	0.0435262
贵州	guizhou	24	2008	0.601977	0.0434042	0.0495461	16.3705	1.71248	0.768	35.1196	34126000	0.2911	0.260447	0.0814042	8824	0.03505
云南	yunnan	25	2008	1.17027	0.0588	0.0202319	20.4814	1.95033	0.7996	14.9445	40947000	0.33	0.221335	0.0787603	12587	0.0350766
西藏	xizang	26	2008	1.26164	0.0360105	0.00167508	13.2764	0.0232919	0.6011	9.04325	2576000	0.2261	0.21972	0.0667702	13861	0.0171908
陕西	shaanxi	27	2008	1.24024	0.06475	0.0404118	30.8488	1.80035	0.6852	37.0044	33999000	0.421	0.164475	0.0958852	18246	0.0868353
甘肃	gansu	28	2008	1.00689	0.0488381	0.0304914	19.9966	1.34757	0.3228	41.4551	23739000	0.3215	0.206369	0.0816799	12110	0.0448747
青海	qinghai	29	2008	1.27473	0.0669439	0.0575041	39.9381	2.67026	0.7522	41.4551	5007000	0.4086	0.217296	0.0685041	17389	0.0747362
宁夏	ningxia	30	2008	1.79539	0.0797869	0.0903976	68.5849	2.06579	0.5645	43.4801	5533000	0.4498	0.228809	0.0647027	17892	0.0765456
新疆	xinjiang	31	2008	1.70415	0.107158	0.0566433	39.3075	1.28289	0.52	53.4946	19004000	0.3964	0.209324	0.0718796	19893	0.0970303
北京	beijing	1	2007	4.93862	0.0913894	0.0150783	74.0805	0.875941	0.9573	52.3353	14554000	0.845	0.0962622	0.101965	58204	0.301273
天津	tianjing	2	2007	2.88364	0.0674678	0.0331374	57.5264	1.41411	0.9331	74.0539	9896000	0.7631	0.11348	0.108529	46122	0.157403
河北	hebei	3	2007	0.979671	0.0572839	0.0416949	35.1041	2.94299	0.5337	55.9707	63501000	0.4025	0.167541	0.088597	19877	0.0415805
山西	shanxi	4	2007	0.94981	0.0472779	0.0938025	33.6652	4.44789	0.3815	48.8576	31069000	0.4403	0.195307	0.0729988	16945	0.0718994
内蒙古	neimenggu	5	2007	1.05757	0.048539	0.105154	27.3748	4.97271	0.5398	21.5517	22066000	0.5015	0.156893	0.0816641	25393	0.0745698
辽宁	liaoning	6	2007	1.45279	0.0690723	0.0600979	56.209	3.64774	0.5652	33.6328	39317000	0.592	0.126765	0.106341	25729	0.0999575
吉林	jilin	7	2007	1.23585	0.0603993	0.035555	39.0385	1.24169	0.3817	24.1402	25067000	0.5316	0.131089	0.0880839	19383	0.0749017
黑龙江	heilongjiang	8	2007	1.06204	0.0552644	0.0330937	30.9643	1.17357	0.2297	13.931	35193000	0.539	0.13156	0.0894212	18478	0.0639988
上海	shanghai	9	2007	4.5553	0.0944533	0.036643	135.632	1.29603	0.7916	56.2693	16708000	0.887	0.0796624	0.142507	66367	0.213408
江苏	jiangsu	10	2007	0.16771	0.056369	0.0267369	72.7448	1.05812	0.8691	61.6982	69503000	0.532	0.142598	0.11152	33928	0.0811511
浙江	zhejiang	11	2007	2.58934	0.071292	0.0257892	73.7503	0.788206	0.8735	40.7735	45844000	0.572	0.146606	0.106317	37411	0.0859191
安徽	anhui	12	2007	0.779196	0.0424344	0.021066	31.1709	1.05967	0.4907	60.3374	56247000	0.387	0.208687	0.105037	12045	0.0393396
福建	fujian	13	2007	1.42718	0.05101	0.0229154	69.3039	1.47001	0.8162	25.9786	32754000	0.487	0.17607	0.100782	25908	0.0567119
江西	jiangxi	14	2007	0.895186	0.0436821	0.0288711	35.3653	1.947	0.7051	43.1054	39945000	0.398	0.226486	0.089473	12633	0.0722067
山东	shandong	15	2007	1.13017	0.0611396	0.0302128	39.0047	1.39268	0.8071	77.329	85696000	0.4675	0.154103	0.0974375	27807	0.0578132
河南	henan	16	2007	0.975917	0.0475183	0.0311296	34.2895	1.02366	0.549	78.8545	86460000	0.3434	0.203713	0.0757113	16012	0.0404398
湖北	hubei	17	2007	1.15091	0.0524007	0.0234732	47.0506	0.893501	0.4188	56.6765	52408000	0.443	0.157037	0.0988208	16206	0.0815723
湖南	hunan	18	2007	0.800623	0.0517688	0.0343612	43.1765	0.781017	0.5277	55.5684	58382000	0.4045	0.167791	0.103302	14492	0.0616764
广东	guangdong	19	2007	2.70857	0.0585717	0.0201611	80.6649	0.449793	0.6303	35.8588	85649000	0.6314	0.191316	0.0736144	33151	0.0645629
广西	guangxi	20	2007	1.18752	0.0445198	0.039547	73.6173	1.04591	0.6838	40.0045	43442000	0.3624	0.219074	0.0918696	12555	0.0401239
海南	hainan	21	2007	11.703	0.0460984	0.00604386	45.6843	0.205216	0.6207	15.4288	7696000	0.472	0.213488	0.0886175	14555	0.0626138
重庆	chongqing	22	2007	1.06973	0.0474744	0.0466651	51.9305	0.80729	0.8233	52.6927	25850000	0.4834	0.189246	0.116828	14660	0.0376971
四川	sichuan	23	2007	1.04629	0.0477994	0.0243667	33.6381	1.28374	0.6992	22.7918	75201000	0.356	0.19138	0.109852	12893	0.0409821
贵州	guizhou	24	2007	0.58669	0.0359924	0.0525053	15.9344	1.73145	0.7115	35.4434	34587000	0.2824	0.272241	0.0829792	6915	0.0321539
云南	yunnan	25	2007	1.04959	0.0496919	0.0213592	20.2959	1.71982	0.8043	14.507	41269000	0.316	0.225278	0.0744869	10540	0.0402499
西藏	xizang	26	2007	9.85946	0.0290684	0.00157318	12.8935	0.0212095	0.667	7.16803	2587000	0.283	0.21724	0.0664863	12109	0.0120783
陕西	shaanxi	27	2007	1.10414	0.0565296	0.0448726	28.8946	1.59382	0.5243	46.5264	34383000	0.4062	0.173574	0.0963558	14607	0.0772691
甘肃	gansu	28	2007	0.918509	0.0401299	0.0314629	18.4807	1.25113	0.2632	40.9932	23990000	0.3159	0.207045	0.0782409	10346	0.0382945
青海	qinghai	29	2007	11.1021	0.0551417	0.056427	39.5411	2.23839	0.9488	40.9932	5045000	0.4007	0.224182	0.0652131	14257	0.0707416
宁夏	ningxia	30	2007	17.1516	0.0712818	0.100156	66.9305	1.88083	0.5241	42.864	5560000	0.4402	0.234712	0.0624101	14649	0.0742623
新疆	xinjiang	31	2007	1.61845	0.0932612	0.0560096	36.3593	1.13217	0.2816	53.665	18872000	0.3915	0.214445	0.0680903	16999	0.0897274
北京	beijing	1	2006	4.73945	0.0835541	0.0179096	73.4532	0.94865	0.9248	58.6497	14294000	0.8433	0.0997621	0.112285	50467	0.293558
天津	tianjing	2	2006	2.55589	0.061216	0.0354859	60.7458	1.33278	0.85	84.6833	9694000	0.7573	0.120796	0.105529	41163	0.152216
河北	hebei	3	2006	0.794869	0.0461777	0.0457793	34.9057	2.23463	0.4654	60.4412	63675000	0.3844	0.166203	0.0848842	16962	0.0393185
山西	shanxi	4	2006	0.83828	0.0425805	0.102046	32.9857	3.78969	0.2308	50.3974	31182000	0.4301	0.200885	0.069848	14123	0.0664847
内蒙古	neimenggu	5	2006	0.913496	0.0413066	0.112128	27.7317	3.92696	0.4828	22.3184	22180000	0.4864	0.162218	0.077908	20053	0.0650674
辽宁	liaoning	6	2006	1.33622	0.0602165	0.0609977	54.2818	3.31702	0.5408	32.136	39231000	0.5899	0.125284	0.105911	21788	0.0957458
吉林	jilin	7	2006	1.15461	0.0509335	0.037753	38.4923	1.11001	0.1781	22.8664	25243000	0.5297	0.131205	0.0825575	15720	0.0702031
黑龙江	heilongjiang	8	2006	0.971903	0.048758	0.033292	32.576	1.10241	0.2334	14.8297	35504000	0.535	0.140041	0.080667	16195	0.0611006
上海	shanghai	9	2006	4.13357	0.0836773	0.0381846	135.404	1.24841	0.5791	49.5093	16525000	0.887	0.0809682	0.144145	57695	0.218309
江苏	jiangsu	10	2006	1.50749	0.049779	0.0292915	74.2075	1.03564	0.8377	62.3064	69474000	0.519	0.149696	0.110588	28814	0.0723743
浙江	zhejiang	11	2006	2.35009	0.0639621	0.0282275	72.6433	0.680096	0.8632	36.1485	45523000	0.565	0.149946	0.100367	31874	0.0841912
安徽	anhui	12	2006	0.703333	0.0365591	0.0229079	29.2671	0.883966	0.3141	50.9741	56880000	0.371	0.213344	0.102092	10055	0.0472133
福建	fujian	13	2006	1.34573	0.0463511	0.024045	65.7507	1.28991	0.5809	24.7116	32855000	0.48	0.179455	0.0935322	21471	0.0583279
江西	jiangxi	14	2006	0.805378	0.0365356	0.0302478	33.5716	1.84507	0.5069	38.9417	40069000	0.3868	0.245227	0.0849285	10798	0.0474089
山东	shandong	15	2006	1.01123	0.0533306	0.0333787	35.2096	1.28105	0.7011	72.1759	85953000	0.461	0.152781	0.095529	23794	0.0572758
河南	henan	16	2006	0.923316	0.0403284	0.034228	31.8906	0.85616	0.4628	72.9404	87180000	0.3247	0.209039	0.0806033	13313	0.0413635
湖北	hubei	17	2006	1.02037	0.0439574	0.0262672	45.1611	0.813077	0.3483	52.9459	53070000	0.438	0.169795	0.0979273	13296	0.0771247
湖南	hunan	18	2006	0.732803	0.0427691	0.0367208	41.5229	0.627264	0.4631	49.2372	58795000	0.3871	0.180083	0.105553	11950	0.0506937
广东	guangdong	19	2006	2.38435	0.051283	0.0213807	76.5841	0.357749	0.5578	31.6438	85451000	0.63	0.20228	0.07107	28332	0.0570289
广西	guangxi	20	2006	1.09399	0.0385586	0.0441689	59.9665	0.899079	0.5748	36.3884	43311000	0.3464	0.222322	0.0898617	10296	0.0456931
海南	hainan	21	2006	10.3432	0.0390687	0.00584719	45.942	0.191008	0.6254	13.7289	7696000	0.461	0.222063	0.0865385	12654	0.0542668
重庆	chongqing	22	2006	0.925146	0.0375607	0.0489906	57.9169	0.678331	0.589	54.0047	26005000	0.467	0.19454	0.114478	12457	0.0449447
四川	sichuan	23	2006	0.906297	0.0387401	0.0291127	33.0663	0.995755	0.5704	25.8452	76324000	0.343	0.198902	0.113005	10546	0.0450976
贵州	guizhou	24	2006	0.462195	0.0275175	0.0542895	15.9759	1.6809	0.6802	33.9541	34666000	0.2746	0.272861	0.0805977	5787	0.0271823
云南	yunnan	25	2006	0.926707	0.0417009	0.0221717	19.4584	1.44394	0.3428	13.7685	41359000	0.305	0.226964	0.0752436	8970	0.0310395
西藏	xizang	26	2006	10.5247	0.024143	0.001554	12.634	0.034965	0.0973	7.0637	2574000	0.2821	0.245144	0.0641026	10430	0.0105887
陕西	shaanxi	27	2006	0.982224	0.0466483	0.047232	25.0376	1.38659	0.6018	45.7125	34574000	0.3912	0.184879	0.0892578	12138	0.0745518
甘肃	gansu	28	2006	0.83908	0.0337889	0.0359202	18.9643	1.0747	0.1828	40.5649	24109000	0.3109	0.217802	0.0739143	8757	0.0330235
青海	qinghai	29	2006	10.3331	0.0517358	0.0576352	38.4373	1.74688	0.9459	40.5649	5049000	0.3926	0.225787	0.0697168	11762	0.0595162
宁夏	ningxia	30	2006	14.9731	0.0572152	0.105434	57.4039	1.4425	0.5541	53.6809	5539000	0.43	0.241199	0.0595775	11847	0.0726916
新疆	xinjiang	31	2006	1.45416	0.078775	0.053798	35.0313	0.846314	0.2696	54.1883	18681000	0.3794	0.225149	0.0664847	15000	0.0869464
